# Supplementary material
Source: MDPI journal article supplement (https://www.mdpi.com/2304-6732/11/2/155)
Supplement: s1 [file s1]

## Supplementary materials

As shown in Fig.S1, the pulse emitted by the femtosecond laser is divided into a detection pulse and a pump pulse by a beam splitter. The pump pulse generates a THz pulse via a photoconductive antenna, the THz pulse perpendicular incident on the sample after collimated by off-axis parabolic mirrors, and the THz pulse carrying on sample information is refocused by off-axis parabolic mirrors and incident on the photoelectric crystal. The detection pulse modulated by Terahertz pulse is converted into an electrical signal by a photodiode, amplified by a lock-in amplifier, and input to a computer for data processing.

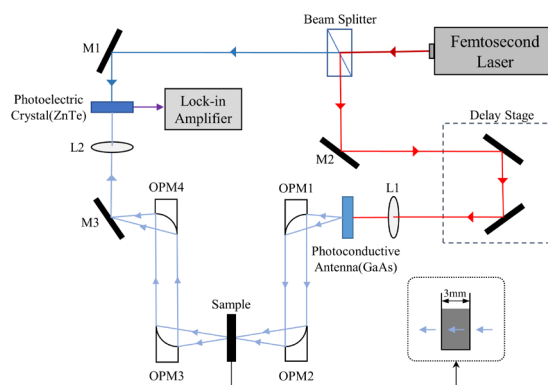

**Figure S1.** Schematic diagram of transmission THz-TDS setup. M1, M2, and M3 are reflectors, L1 and L2 are lenses, and OPM1, OPM2, OPM3, and OPM4 are off-axis parabolic mirrors.

**Table S1.** Country, name, and number of crude oil samples.

| Country <sup>a</sup> | Sample name <sup>b</sup> | Sample number | Sample name <sup>b</sup> | Sample number |
|----------------------|--------------------------|---------------|--------------------------|---------------|
| Angola<br>(15)       | SATURNO                  | Angola1       | SATURNO                  | Angola2       |
|                      | BLEND1                   |               | BLEND2                   |               |
|                      | KISSANJE1                | Angola3       | KISSANJE2                | Angola4       |
|                      | KISSANJE3                | Angola5       | KISSANJE4                | Angola6       |

|                      |                    |               |                    |               |
|----------------------|--------------------|---------------|--------------------|---------------|
|                      | CLOV1              | Angola7       | CLOV2              | Angola8       |
|                      | CABINBA            | Angola9       | PLUTONIO1          | Angola10      |
|                      | PLUTONIO2          | Angola11      | MEMBA              | Angola12      |
|                      | OLOMBEN DO         | Angola13      | GINDUNGO           | Angola14      |
|                      | HUNGO              | Angola15      |                    |               |
| Brazil<br>(24)       | LAPA1              | Brazil1       | LAPA2              | Brazil2       |
|                      | SAPINHOA1          | Brazil3       | SAPINHOA2          | Brazil4       |
|                      | SAPINHOA3          | Brazil5       | SAPINHOA4          | Brazil6       |
|                      | SAPINHOA5          | Brazil7       | TUPI1              | Brazil8       |
|                      | TUPI2              | Brazil9       | TUPI3              | Brazil10      |
|                      | TUPI4              | Brazil11      | TUPI5              | Brazil12      |
|                      | BUZIOS1            | Brazil13      | BUZIOS2            | Brazil14      |
|                      | BUZIOS3            | Brazil15      | IRACEMA1           | Brazil16      |
|                      | IRACEMA2           | Brazil17      | IRACEMA3           | Brazil18      |
|                      | IRACEMA4           | Brazil19      | LULA1              | Brazil20      |
|                      | LULA2              | Brazil21      | LULA3              | Brazil22      |
|                      | LULA4              | Brazil23      | SURURU             | Brazil24      |
| Saudi Arabia<br>(10) | ARABIAN<br>MEDIUM1 | Saudi-Arabia1 | ARABIAN<br>MEDIUM2 | Saudi-Arabia2 |
|                      | ARABIAN<br>MEDIUM3 | Saudi-Arabia3 | ARABIAN<br>HEAVY1  | Saudi-Arabia4 |

|                                     |                   |               |                   |                |
|-------------------------------------|-------------------|---------------|-------------------|----------------|
|                                     | ARABIAN<br>HEAVY2 | Saudi-Arabia5 | ARABIAN<br>HEAVY3 | Saudi-Arabia6  |
|                                     | ARABIAN<br>LIGHT1 | Saudi-Arabia7 | ARABIAN<br>LIGHT2 | Saudi-Arabia8  |
|                                     | ARABIAN<br>LIGHT3 | Saudi-Arabia9 | ARABIAN<br>LIGHT4 | Saudi-Arabia10 |
| Russia<br><br>(19)                  | ESPO1             | Russia1       | ESPO2             | Russia2        |
|                                     | ESPO3             | Russia3       | ESPO4             | Russia4        |
|                                     | ESPO5             | Russia5       | ESPO6             | Russia6        |
|                                     | ESPO7             | Russia7       | ESPO8             | Russia8        |
|                                     | ESPO9             | Russia9       | ESPO10            | Russia10       |
|                                     | ESPO11            | Russia11      | ESPO12            | Russia12       |
|                                     | ESPO13            | Russia13      | ESPO14            | Russia14       |
|                                     | ESPO15            | Russia15      | ESPO16            | Russia16       |
|                                     | SOKOL1            | Russia17      | SOKOL2            | Russia18       |
|                                     | SOKOL3            | Russia19      |                   |                |
| The Republic of<br>Congo<br><br>(8) | DJENO1            | Congo1        | DJENO2            | Congo2         |
|                                     | DJENO3            | Congo3        | DJENO4            | Congo4         |
|                                     | DJENO5            | Congo5        | DJENO6            | Congo6         |
|                                     | DJENO7            | Congo7        | DJENO8            | Congo8         |
| Iran<br><br>(7)                     | IRANIAN<br>HEAVY1 | Iran1         | IRANIAN<br>HEAVY2 | Iran2          |

|  |                |       |                |       |
|--|----------------|-------|----------------|-------|
|  | SIRRI1         | Iran3 | SIRRI2         | Iran4 |
|  | IRANIAN LIGHT1 | Iran5 | IRANIAN LIGHT2 | Iran6 |
|  | IRANIAN LIGHT3 | Iran7 |                |       |

<sup>a</sup> the numbers in brackets represent the number of samples.

<sup>b</sup> the sample names represent the port/variety/pipeline/oilfield of the crude oil source, and the suffix numbers represent different batches of imported crude oil.

(The crude oil samples used in this experiment are provided by Qingdao Customs Technical Center)

To provide an intuitive understanding of the crude oil classification issue discussed in the main text, we present the spectral information of all 83 crude oil samples, as shown in Fig. S2.

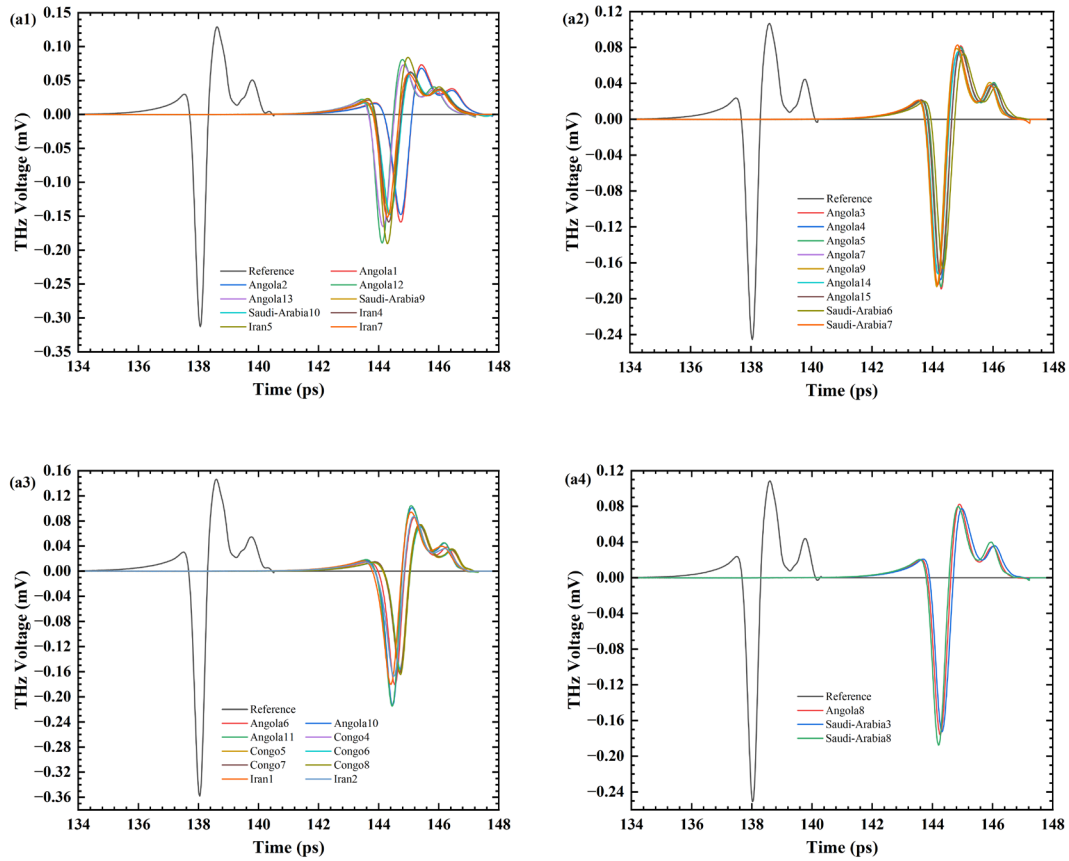

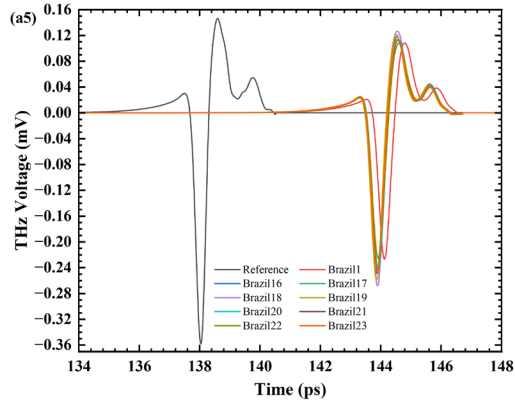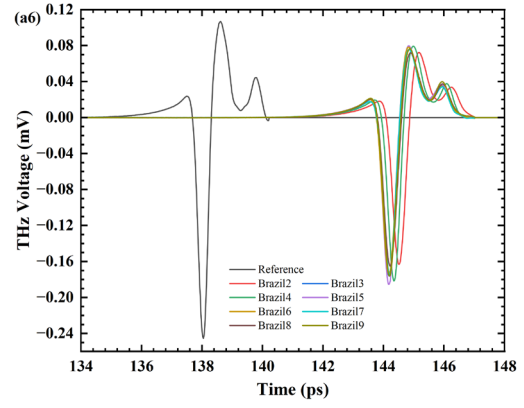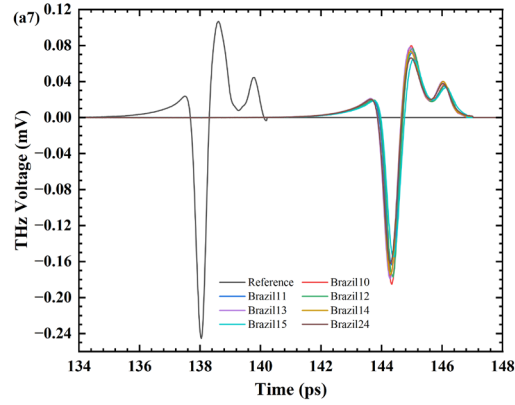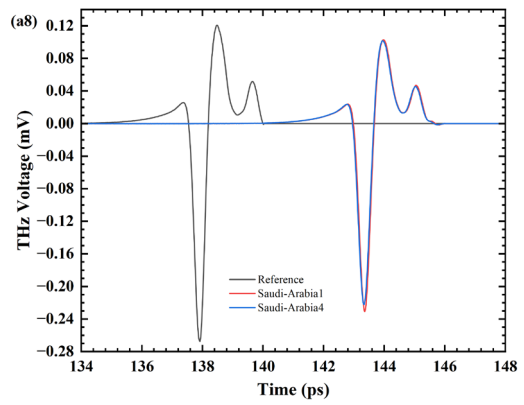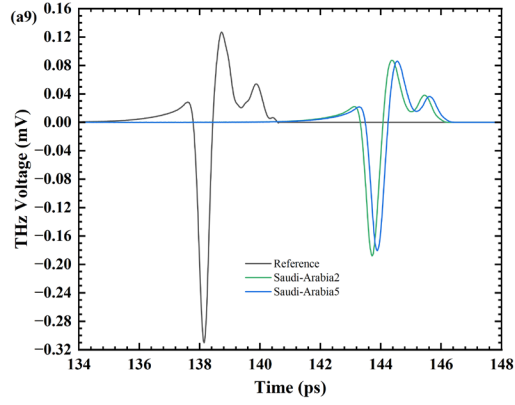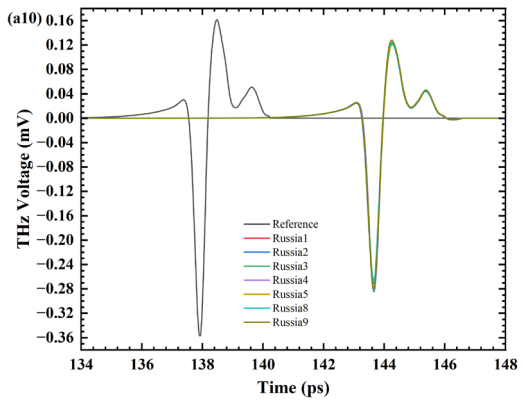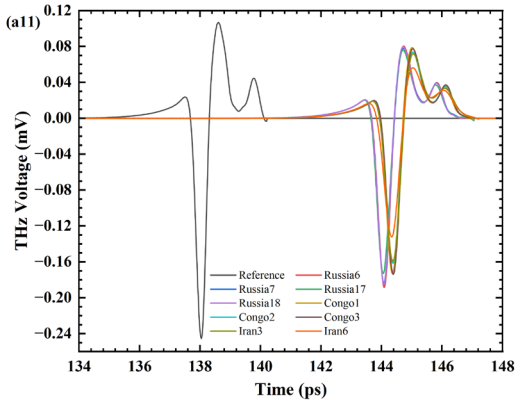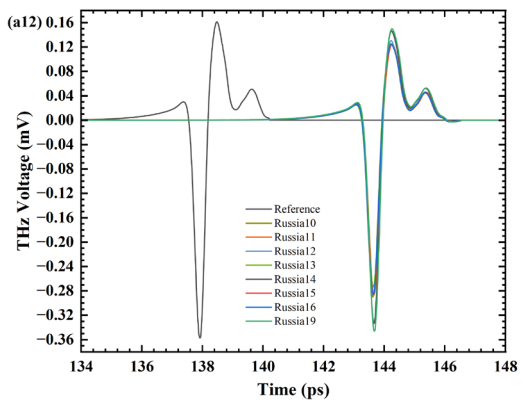

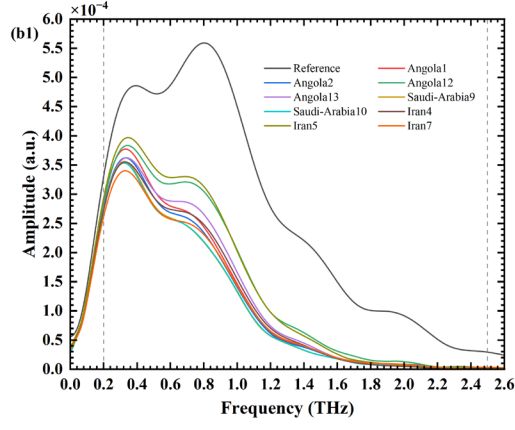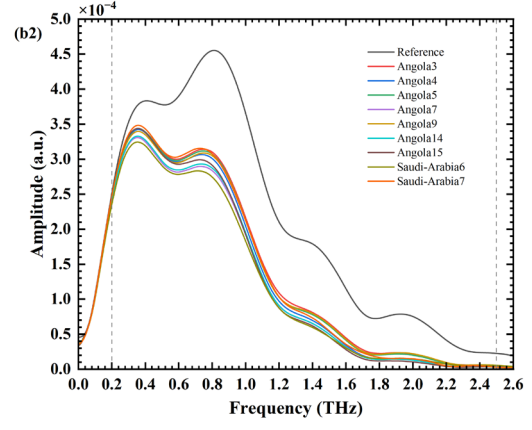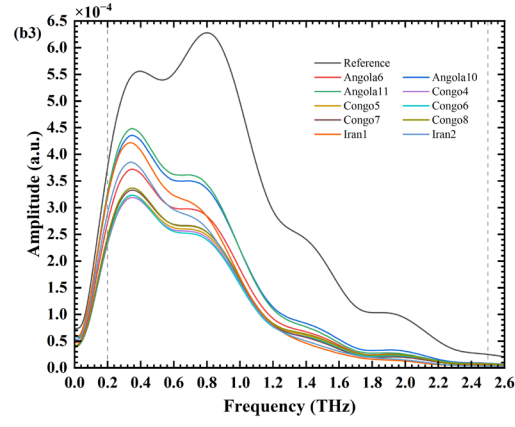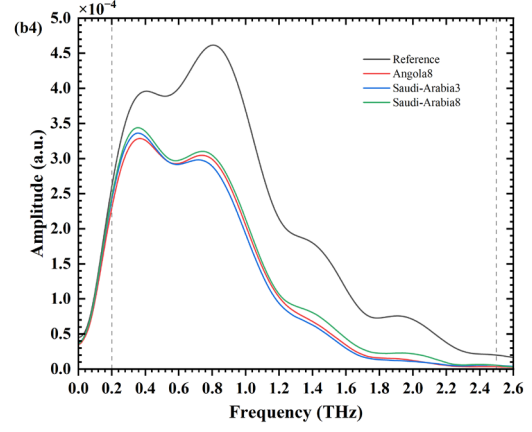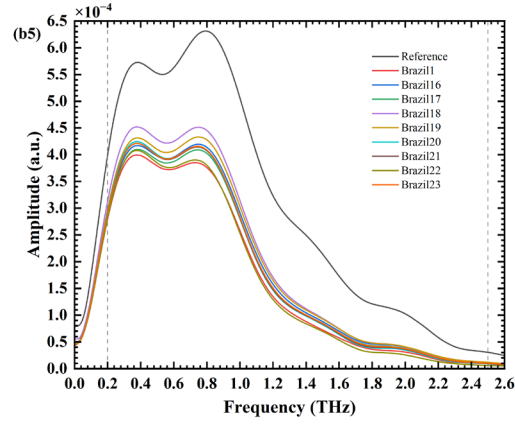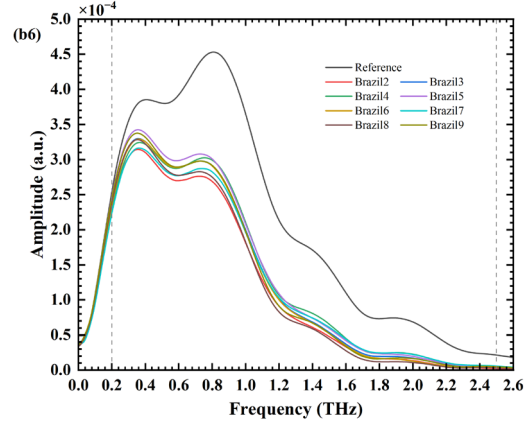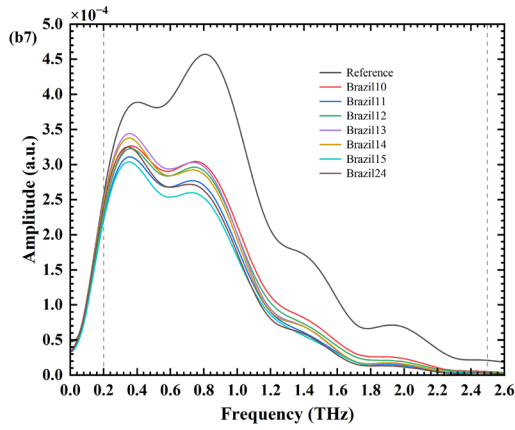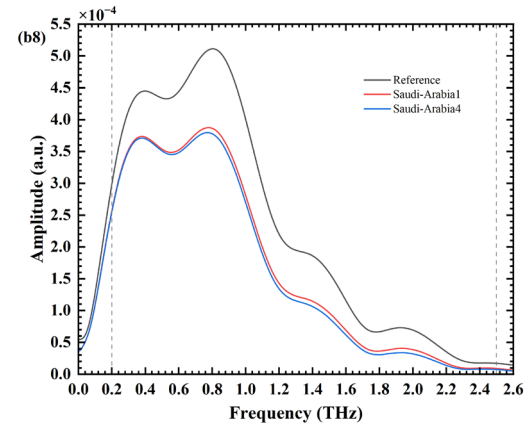

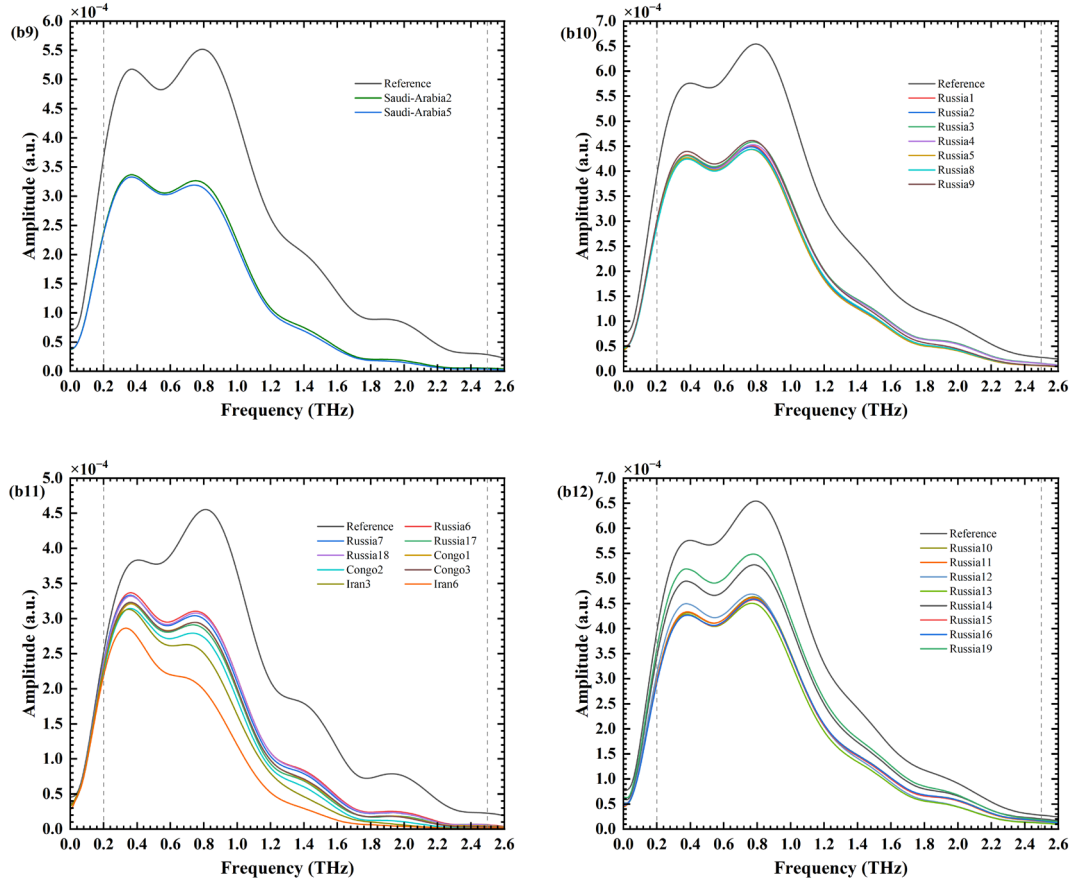

**Figure S2.** (a1) - (a12) are THz time-domain spectra of crude oils; (b1) - (b12) are THz frequency-domain spectra of crude oils.

Fig. S3 shows the refractive index spectra and absorption coefficient spectra of all the crude oils described in the main text.

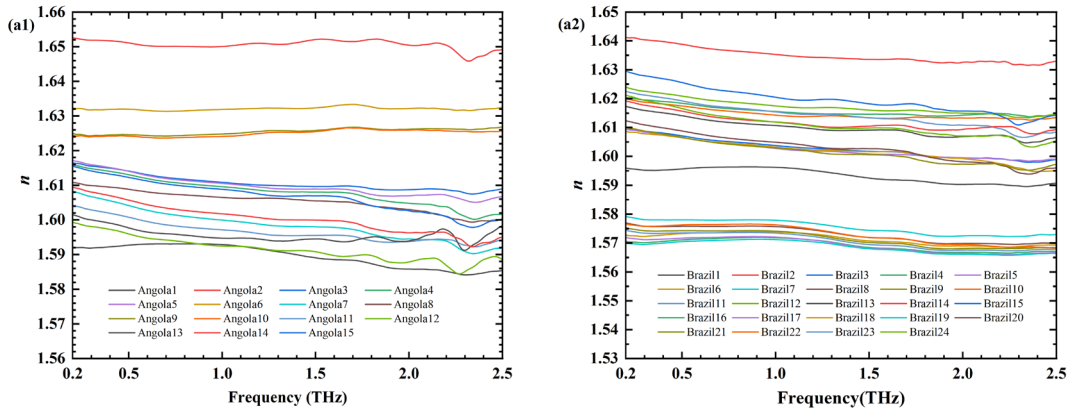

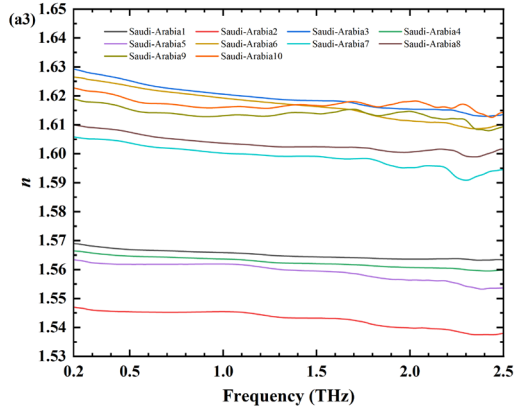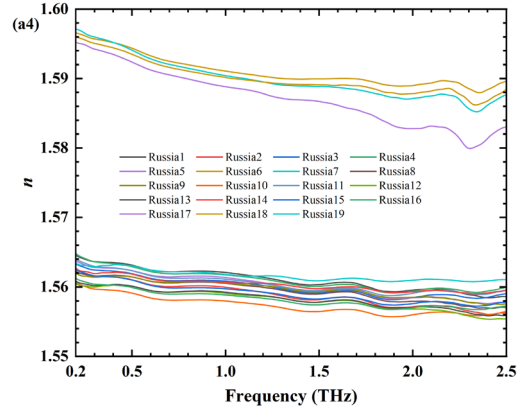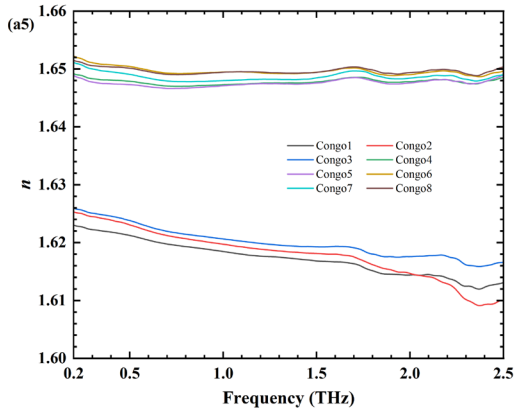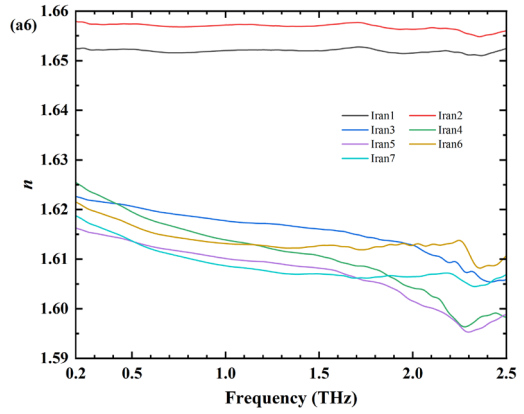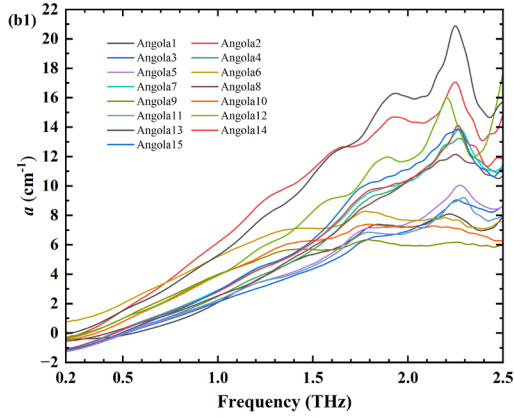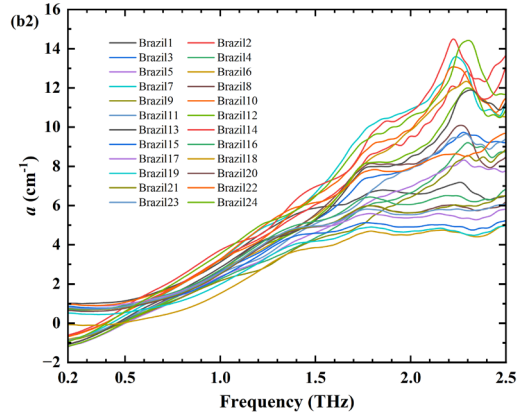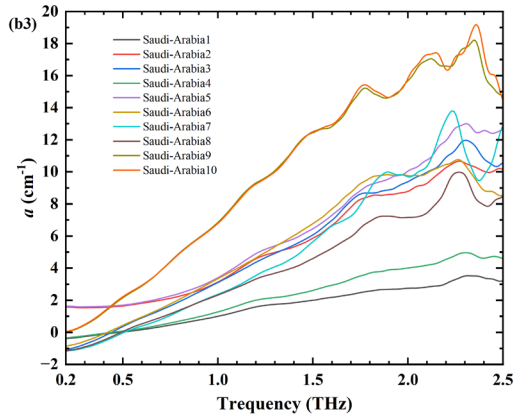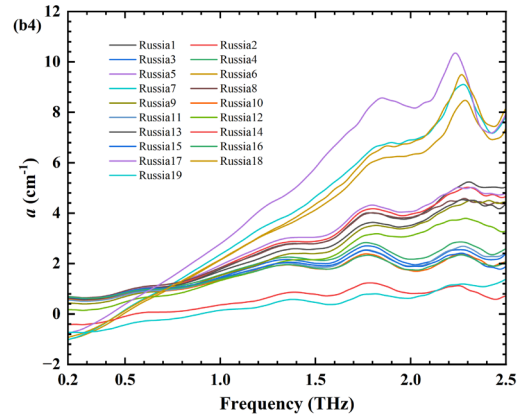



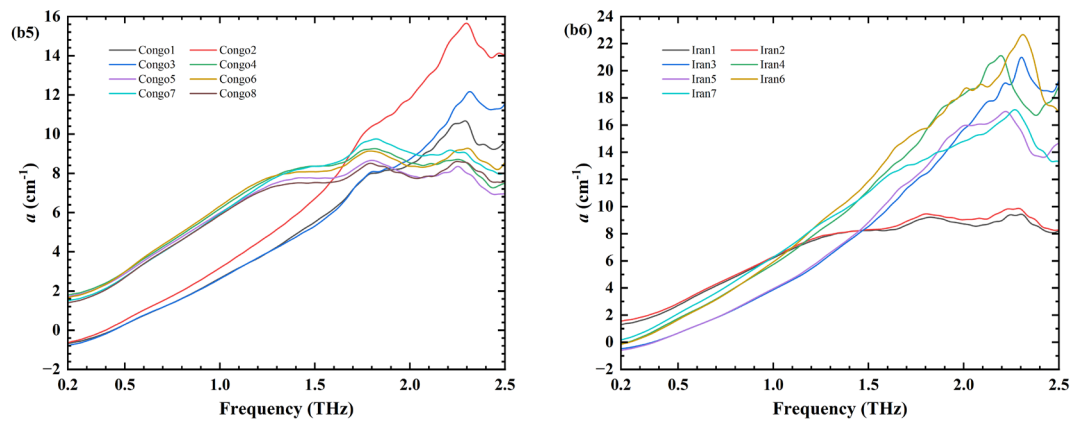

**Figure S3.** (a1) - (a6) are the refractive index spectra of crude oil; (b1) - (b6) are the absorption coefficient spectra of crude oil.
